# Supplementary material for: Size effect of lithium peroxide on charging performance of Li–O2batteries
Source: Royal Society of Chemistry journal article supplement (doi:10.1039/c3nr04728h), 2013-11-12
Supplement: c3nr04728h.pdf [file c3nr04728h.pdf]

## Electronic Supplementary Information (ESI)

### 5 Size Effect of Lithium Peroxide on Charging Performance of Li-O<sub>2</sub> Batteries

Yuxiang Hu, Xiaopeng Han, Fangyi Cheng,\* Qing Zhao, Zhe Hu, and Jun Chen\*

Key Laboratory of Advanced Energy Materials Chemistry (Ministry of Education), College of Chemistry,  
Nankai University, Tianjin 300071, China; Synergetic Innovation Center of Chemical Science and Engineering  
10 (Tianjin), Tianjin 300071, China. Fax: 86-22-23509571, Tel: 86-22-23504482

(F. Cheng) E-mail: fycheng@nankai.edu.cn; (J. Chen) E-mail: chenabc@nankai.edu.cn

#### Experimental Details

**Synthesis.** Lithium peroxide samples with three different sizes were synthesized as follows. SL-600 was fabricated  
15 by discharging the Li-oxygen cell (based on Super P carbon electrode) at current density of 50 mA g<sup>-1</sup><sub>carbon</sub>. By  
adjusting the cut-off discharge capacity, the nominal weight proportion of Li<sub>2</sub>O<sub>2</sub>:C was controlled at 1:1. SL-300 was  
prepared by mechanical mixing the commercial Li<sub>2</sub>O<sub>2</sub> with Super P for 60 min under argon atmosphere. SL-160 was  
fabricated by ball-milling the commercial Li<sub>2</sub>O<sub>2</sub> and Super P for 100 min under argon atmosphere. The weight ratio  
of Li<sub>2</sub>O<sub>2</sub>:C was fixed at 1:1 in SL-160 and SL-300.

20 **Materials characterization.** Power X-ray diffraction (XRD) analysis was performed on a MiniFlex600 X-ray  
generator with a Cu source in transmission mode. Fourier Transform Infrared (FTIR) spectroscopies were obtained by  
a FTIR-650 spectrometer (Tianjin Gangdong) at a resolution of 2 cm<sup>-1</sup>. Scanning electron microscopy (SEM) images  
were collected on a JEOL JSM-7500F microscope.

**Cell assembly.** The CR2032-type and the Swagelok-type cells were used in this study. For the cathode: the slurry  
25 was consisted of Super P, Li<sub>2</sub>O<sub>2</sub> and poly(vinylidene fluoride) (PVDF) with weight ratio of 45:45:10 using N-methyl-  
2-pyrrolidinone(NMP) as a dispersing agent. The slurry was smeared onto circular nickel foam with diameter of ~12

mm, which was dried overnight at 110 °C in a vacuum oven for 6 h. The separator was a glass fiber. Lithium foil was used as the anode. The electrolyte was 1 M Lithium bis-(trifluoromethanesulfonyl)-imide (LiTFSI) in tetraethylene glycol dimethyl ether (TEGDME) dried by molecular sieve. The cell assembly was carried out in a glove box under Ar atmosphere. After that, the cell was transferred to a sealed glass box filled with high-purity oxygen.

5 **Electrochemical Measurements.** The cells were kept in oxygen for 5 h at the open-circuit state (voltage is ~3.0 V vs. Li). Electrochemical tests were conducted by a LAND-CT2001A battery-testing instrument. All the three samples were charged at 50 mA g<sup>-1</sup><sub>carbon</sub> to an end-up voltage of the 4.5 V. Cyclic voltammograms (CVs) were carried out with a Parstat 263A electrochemical workstation (AMETEK) at scanning rate of 0.1 mV s<sup>-1</sup>. The electrochemical impedance spectroscopy (EIS) was conducted using Parstat 2273 potentiostat/galvanostat workstation (AMETEK)  
10 within the frequency range of 100 kHz–100 mHz at different controlled temperatures.

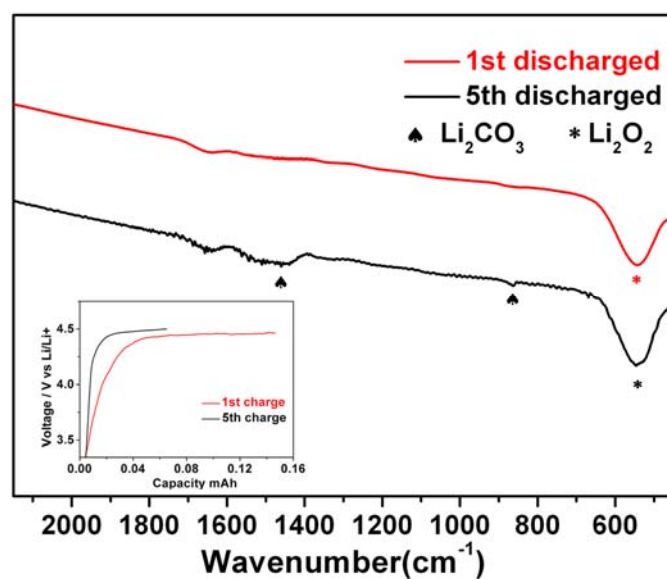

**Fig. S1** FTIR spectra of SL-600 (red line) and the discharged product at the 5th cycle. The inset compares the charging plateaus at 1<sup>st</sup> and 5<sup>th</sup> cycle.

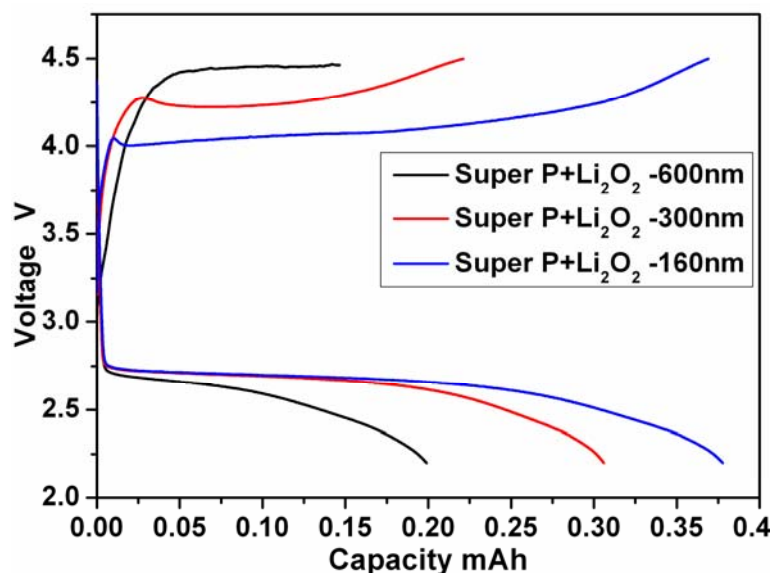

**Fig. S2** Typical charge-discharge curves of SL-600, SL-300 and SL-160 at a current density of  $50 \text{ mA g}^{-1}_{\text{carbon}}$ .

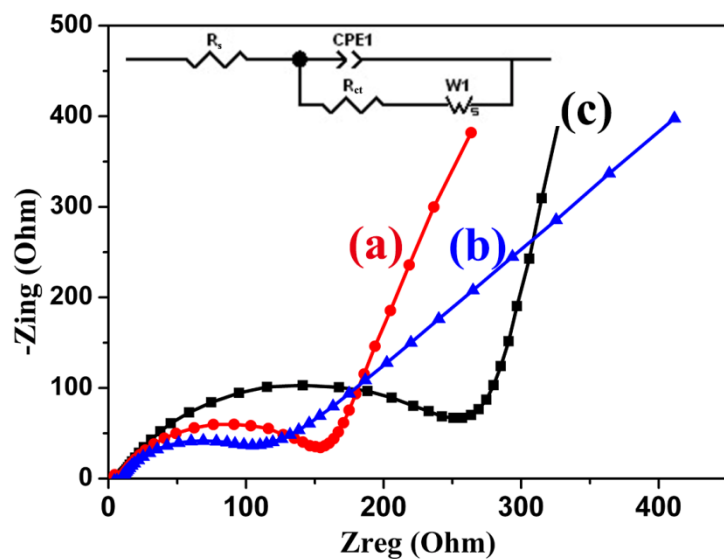

**Fig. S3** EIS of the cells tested at midpoint charging plateau (at current density of  $50 \text{ mA g}^{-1}_{\text{carbon}}$ ) and 298 K: (a) SL-600, (b) SL-300, and (c) SL-160. The inset shows the equivalent circuit to fit the EIS data.

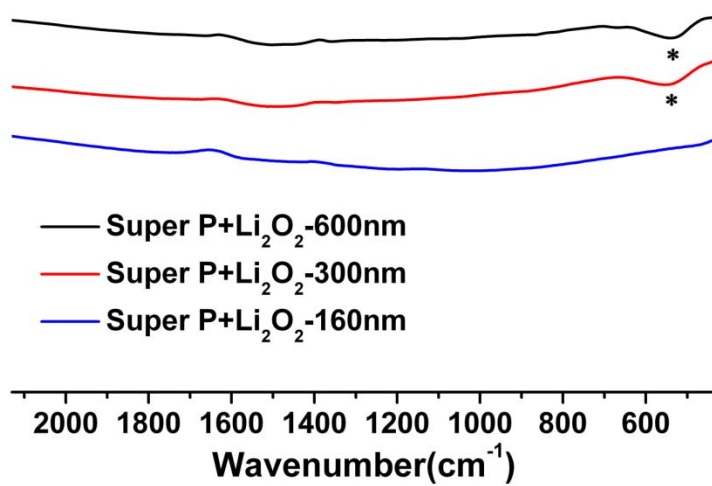

**Fig. S4** FTIR spectra of SL-600 (black), SL-300 (red) and SL-160 (blue) electrodes after charging.
